# Supplementary material for: Delayed development of systemic immunity in preterm pigs as a model for preterm infants
Source: Springer Nature journal article supplement (doi:10.1038/srep36816), 2016-11-10
Supplement: 41598_2016_BFsrep36816_MOESM1_ESM.pdf [file 41598_2016_BFsrep36816_MOESM1_ESM.pdf]

## **Supplementary information**

### **Delayed development of systemic immunity in preterm pigs as a model of preterm infants**

Duc Ninh Nguyen<sup>1</sup>, Pingping Jiang<sup>1</sup>, Hanne Frøkiær<sup>2</sup>, Peter M.H. Heegaard<sup>3</sup>, Thomas Thymann<sup>1</sup>, Per T. Sangild<sup>1,4\*</sup>

<sup>1</sup>*Section of Comparative Pediatrics and Nutrition, Department of Veterinary Clinical and Animal Sciences, University of Copenhagen, Denmark*

<sup>2</sup>*Department of Veterinary Disease Biology, University of Copenhagen, Denmark*

<sup>3</sup>*National Veterinary Institute, Technical University of Denmark, Frederiksberg, Denmark*

<sup>4</sup>*Department of Pediatrics and Adolescent Medicine, Rigshospitalet, Copenhagen, Denmark*

Corresponding author: Per T. Sangild, Section of Comparative Pediatrics and Nutrition, Department of Veterinary Clinical and Animal Sciences, University of Copenhagen, Dyrlægevej 68, DK-1870 Frederiksberg C, Denmark. Tel: +45 35 33 26 98, Fax: +45 35 33 24 83, Email: [pts@sund.ku.dk](mailto:pts@sund.ku.dk)

**a** Preterm NET induction ex vivo: plasma cfDNA

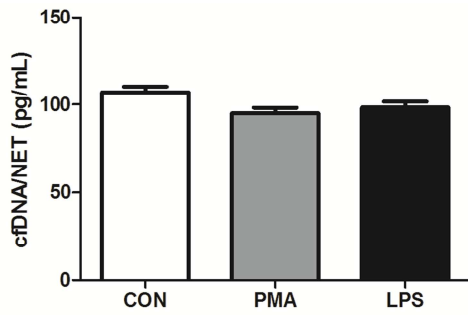

**b** Preterm NET induction in vivo: plasma cfDNA

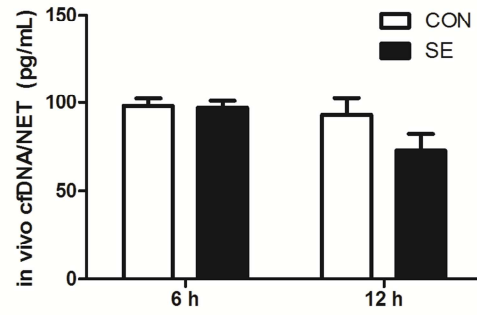

**Supplementary Figure S1: Impairment of *ex vivo* and *in vivo* NET production in newborn preterm pigs.** a: Plasma cfDNA levels following *ex vivo* stimulation of whole blood with 100 ng/mL PMA or 1  $\mu$ g/mL LPS for 3 h (n = 61). b: Plasma cfDNA levels from pigs following infusion of systemic saline or *S.epidermidis* ( $5 \times 10^9$  cells/kg) for 6-12 h (n = 6). SE: *S.epidermidis*
